# Supplementary material for: Development of a Monoclonal scFv against Cytotoxin to Neutralize Cytolytic Activity Induced by Naja atra Venom on Myoblast C2C12 Cells
Source: MDPI journal article supplement (doi:10.3390/toxins14070459), 2022-07-04
Supplement: s1 [file s1]

Supplementary Materials

## Development of a Monoclonal scFv against Cytotoxin to Neutralize Cytolytic Activity Induced by *Naja atra* Venom on Myoblast C2C12 Cells

Chien-Chun Liu, Cho-Ju Wu, Tsai-Ying Chou, Geng-Wang Liaw, Yung-Chin Hsiao, Lichieh Julie Chu, Chi-Hsin Lee, Po-Jung Wang, Cheng-Hsien Hsieh, Chun-Kuei Chen and Jau-Song Yu

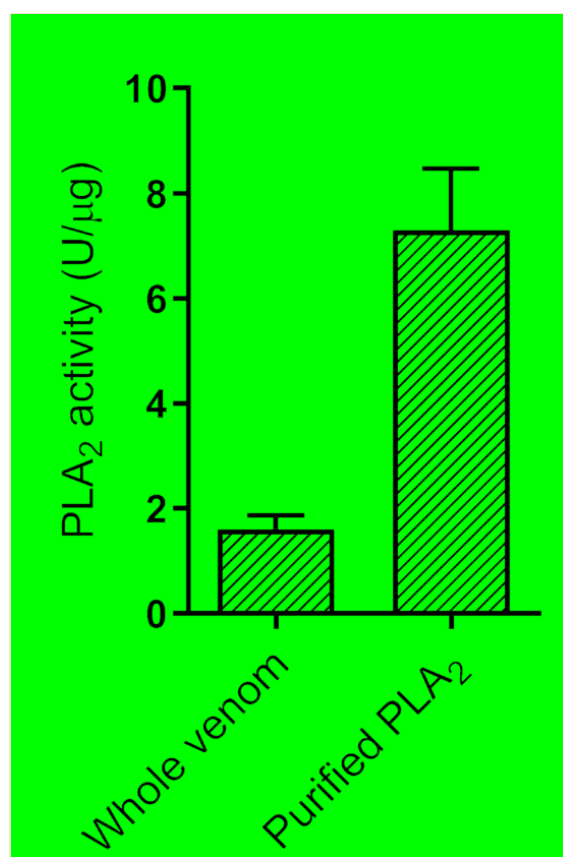

**Figure S1.** Enzymatic activity of PLA<sub>2</sub> purified from *N. atra* venom. PLA<sub>2</sub> activity of was determined using EnzChek™ Phospholipase A<sub>2</sub> assay kits (Thermo Fisher, MA, USA). Each bar represents the mean ± SD of triplicate determinations.

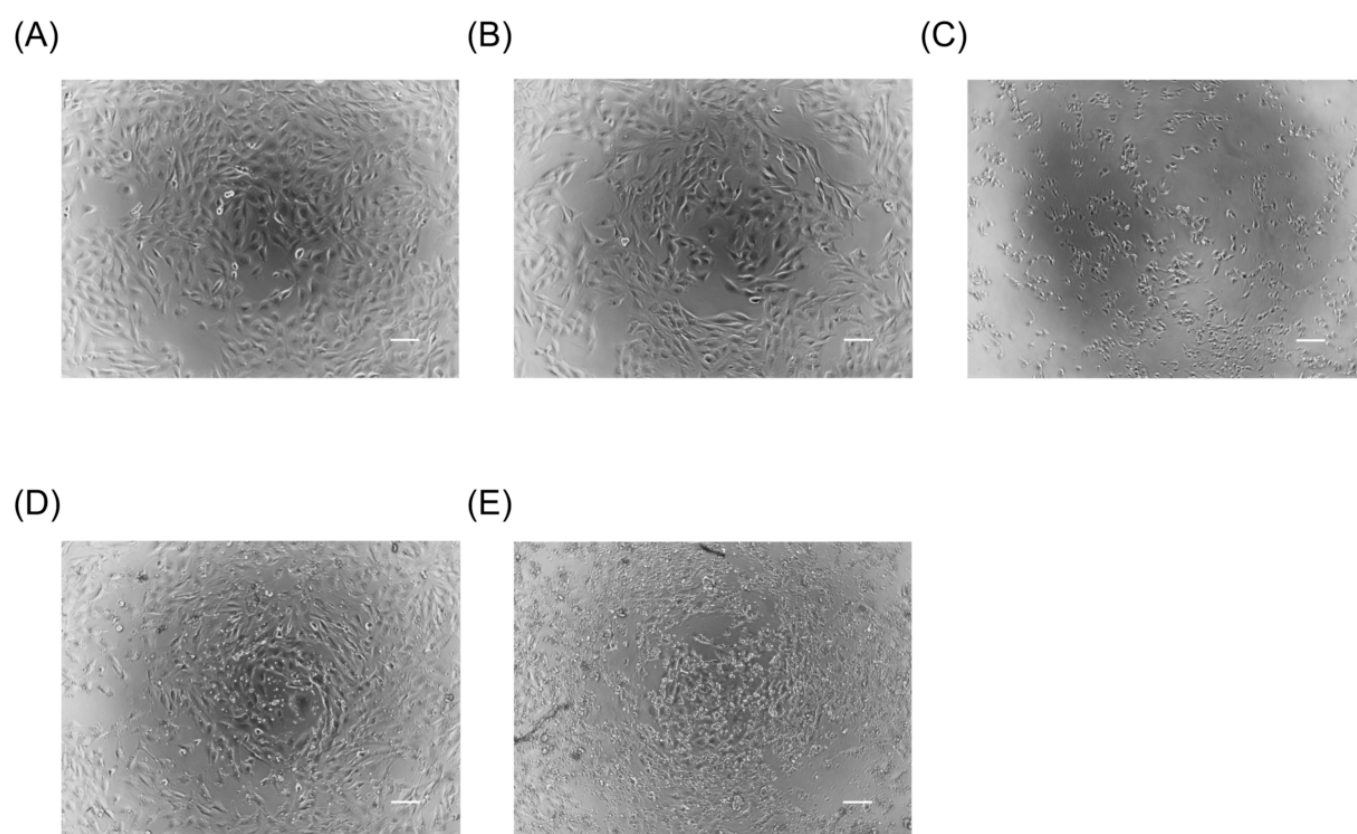

**Figure S2.** Morphology of C2C12 cells treated with proteins from *N. atra* venom. (A) NTX, (B) PLA<sub>2</sub>, (C) CTX, (D) CRISP, and (E) SVMP. .

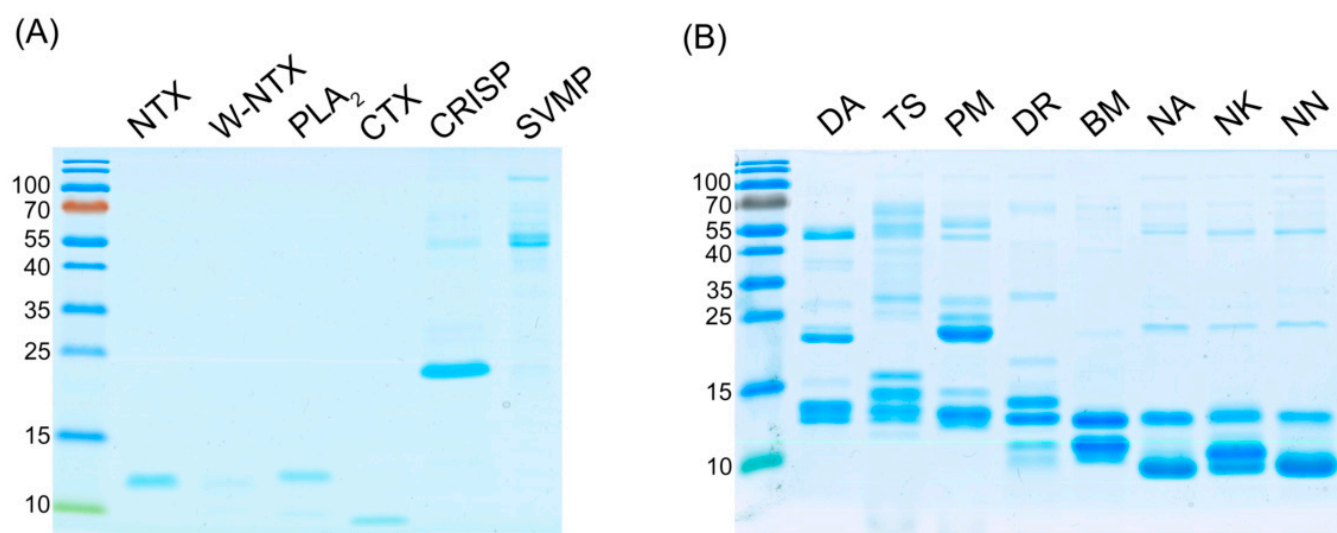

**Figure S3.** Protein profiles of snake venom. SDS-PAGE analyses of (A) six components of *N. atra* venom and (B) venom from eight different species of snakes.
